# Supplementary material for: Effectiveness of a Family-Management Program for Family having Children with Acute Lymphoblastic Leukemia: A Quasi-Experimental Study
Source: Research Square preprint supplement (doi:10.21203/rs.3.rs-5080290/v1), 2024-12-25
Supplement: Supplementary file 1 [file 36c03049b3ed12051e1e571b.docx]

**Table 1** Characteristics of the participants in the intervention and control groups

| **Characteristic** | **Intervention group**  **(N = 23)** | | **Control group**  **(N = 23)** | | ***t*** | **χ2** | ***p*** |
| --- | --- | --- | --- | --- | --- | --- | --- |
| **n** | **%** | **n** | **%** |
| **Parents**  Age (years) | *M* = 32.65  (*SD* = 8.77, range 22-52) | | *M* = 30.13  (*SD* = 8.07, range 19-50) | | -1.015 |  | .251 |
| **Education**  < Bachelor Degrees | 19 | 82.6 | 18 | 78.3 |  | .138 | .710 |
| ≥ Bachelor Degrees | 4 | 17.4 | 5 | 21.7 |  |  |  |
| **Occupation**  Government | 2 | 8.7 | 0 | 0 |  | .352† | .385 |
| Private company | 1 | 4.3 | 8 | 34.8 |  |  |  |
| Own business | 4 | 17.4 | 0 | 0 |  |  |  |
| Employee | 10 | 43.5 | 10 | 43.5 |  |  |  |
| Housewife | 6 | 26.1 | 5 | 21.7 |  |  |  |
| **Parents’ living status**  Cohabitated | 20 | 87.0 | 20 | 87.0 |  | .223† | .353 |
| Separated/divorced | 3 | 13.0 | 1 | 4.3 |  |  |  |
| Single | 0 | 0 | 2 | 8.7 |  |  |  |
| **Relationship with children**  Father 4 | | 17.4 | 6 | 26.1 |  | .475† | .722 |
| Mother | 19 | 82.6 | 17 | 73.9 |  |  |  |
| **Child gender**  Boy | 11 | 47.8 | 11 | 47.8 |  | 1.000† | 1.000 |
| Girl | 12 | 52.2 | 12 | 52.2 |  |  |  |
| Age (months) | *M* = 45.87  (*SD* = 10.70, range 24-60) | | *M* = 51.17  (*SD* = 8.98, range 32-60) | | 1.821 |  | .741 |
| Duration of treatment  (months) | *M* = 31.61  (*SD* = 10.13, range 18-60) | | *M* = 28.48  (*SD* = 7.63, range 12-36) | | -1.184 |  | .385 |

*t* = Independent t-test, χ2 = Chi-squared, † = Fisher’s Exact test

**Table 2** Means and standard deviations of the study outcomes for the intervention and the control group among three time measures

| **Outcome** | **Week** | **Time**  **measure** | **Intervention (N = 23)** | | **Control (N = 23)** | |
| --- | --- | --- | --- | --- | --- | --- |
| ***M*** | ***SD*** | ***M*** | ***SD*** |
| Family management | 1 | 1 | 175.22 | 12.81 | 178.26 | 12.81 |
|  | 3 | 2 | 177.22 | 9.30 | 177.87 | 12.53 |
|  | 7 | 3 | 188.61 | 9.51 | 179.00 | 13.33 |
| Family quality of life | 1 | 1 | 97.65 | 16.63 | 100.70 | 16.70 |
|  | 3 | 2 | 92.30 | 14.70 | 99.35 | 16.81 |
|  | 7 | 3 | 103.30 | 8.48 | 99.30 | 16.33 |
| Child quality of life | 1 | 1 | 68.52 | 18.46 | 69.26 | 15.62 |
|  | 3 | 2 | 62.48 | 15.47 | 70.48 | 16.29 |
|  | 7 | 3 | 78.30 | 13.88 | 69.57 | 15.49 |

**Table 3** Two-way repeated measures ANOVAs of total score of family management, family quality of life and child quality of life.

| **Source** | ***SS*** | ***df*** | ***MS*** | ***F*** | ***p*-value** | **η2*p*** |
| --- | --- | --- | --- | --- | --- | --- |
| **Family management**  Between subject |  |  |  |  |  |  |
| Group | 134.03 | 1 | 134.03 | 0.427 | 0.517 | 0.010 |
| Error | 13804.52 | 44 | 313.74 |  |  |  |
| Within subject |  |  |  |  |  |  |
| Time | 1376.36 | 1.46 | 943.32 | 17.393 | < 0.001 | 0.283 |
| Time* Group | 1039.15 | 1.46 | 712.20 | 13.132 | < 0.001 | 0.230 |
| Error time | 3481.83 | 64.19 | 54.24 |  |  |  |
| **Family quality of life** |  |  |  |  |  |  |
| Between subject |  |  |  |  |  |  |
| Group | 142.03 | 1 | 142.03 | 0.24 | 0.626 | 0.005 |
| Error | 25945.88 | 44 | 589.68 |  |  |  |
| Within subject |  |  |  |  |  |  |
| Time | 701.623 | 1.7 | 412.13 | 6.57 | 0.004 | 0.130 |
| Time* Group | 719.014 | 1.7 | 422.35 | 6.73 | 0.003 | 0.133 |
| Error time | 4702.029 | 74.91 | 62.77 |  |  |  |
| **Child quality of life** |  |  |  |  |  |  |
| Between subject |  |  |  |  |  |  |
| Group | 0.000 | 1 | .000 | 0.000 | 1.00 | 0.000 |
| Error | 28484.58 | 44 | 647.38 |  |  |  |
| Within subject |  |  |  |  |  |  |
| Time | 1376.36 | 2 | 665.92 | 11.73 | < 0.001 | 0.210 |
| Time* Group | 1039.15 | 2 | 810.28 | 14.27 | < 0.001 | 0.245 |
| Error time | 3481.83 | 88 | 56.77 |  |  |  |

η2*p* = Partial Eta Squared
